# Supplementary material for: USP19 deubiquitinates HDAC1/2 to regulate DNA damage repair and control chromosomal stability
Source: PubMed Central journal article supplement (PMC5356792; doi:10.18632/oncotarget.11116), 2016-08-08
Supplement: oncotarget-08-2197-s001.pdf [file oncotarget-08-2197-s001.pdf]

## USP19 deubiquitinates HDAC1/2 to regulate DNA damage repair and control chromosomal stability

### SUPPLEMENTARY FIGURE

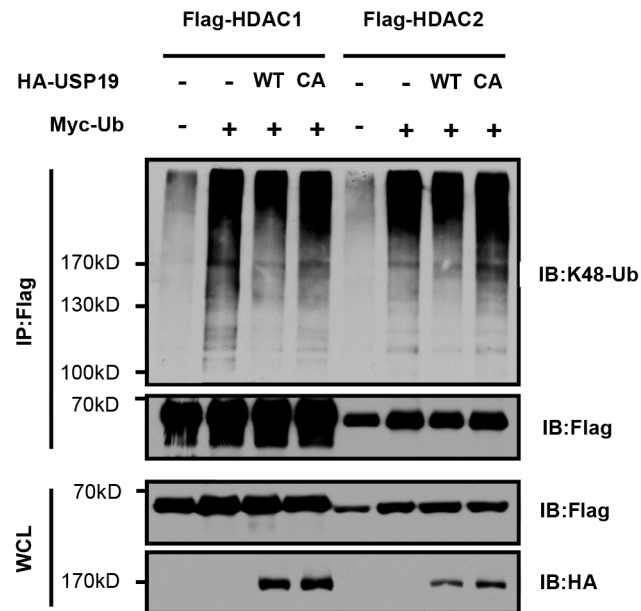

**Supplementary Figure S1:** HEK293T cells were transfected with Myc-Ub, Flag-HDAC1, Flag-HDAC2, HA-USP19 WT, HA-USP19 CA as indicated, 48h later, treated with MG132 for 4h. Cell lysates were extracted under denaturing conditions (95°C, 1% SDS), then immunoprecipitated with anti-Flag and immunoblotted with linkage-specific antibodies recognizing K48-linked polyubiquitin.
